# Supplementary material for: Cepharanthine hydrochloride reverses the mdr1 (P-glycoprotein)-mediated esophageal squamous cell carcinoma cell cisplatin resistance through JNK and p53 signals
Source: PubMed Central journal article supplement (PMC5762312; doi:10.18632/oncotarget.22676), 2017-11-27
Supplement: oncotarget-08-111144-s001.pdf [file oncotarget-08-111144-s001.pdf]

# Cepharanthine hydrochloride reverses the *mdr1* (P-glycoprotein)-mediated esophageal squamous cell carcinoma cell cisplatin resistance through JNK and p53 signals

## SUPPLEMENTARY MATERIALS

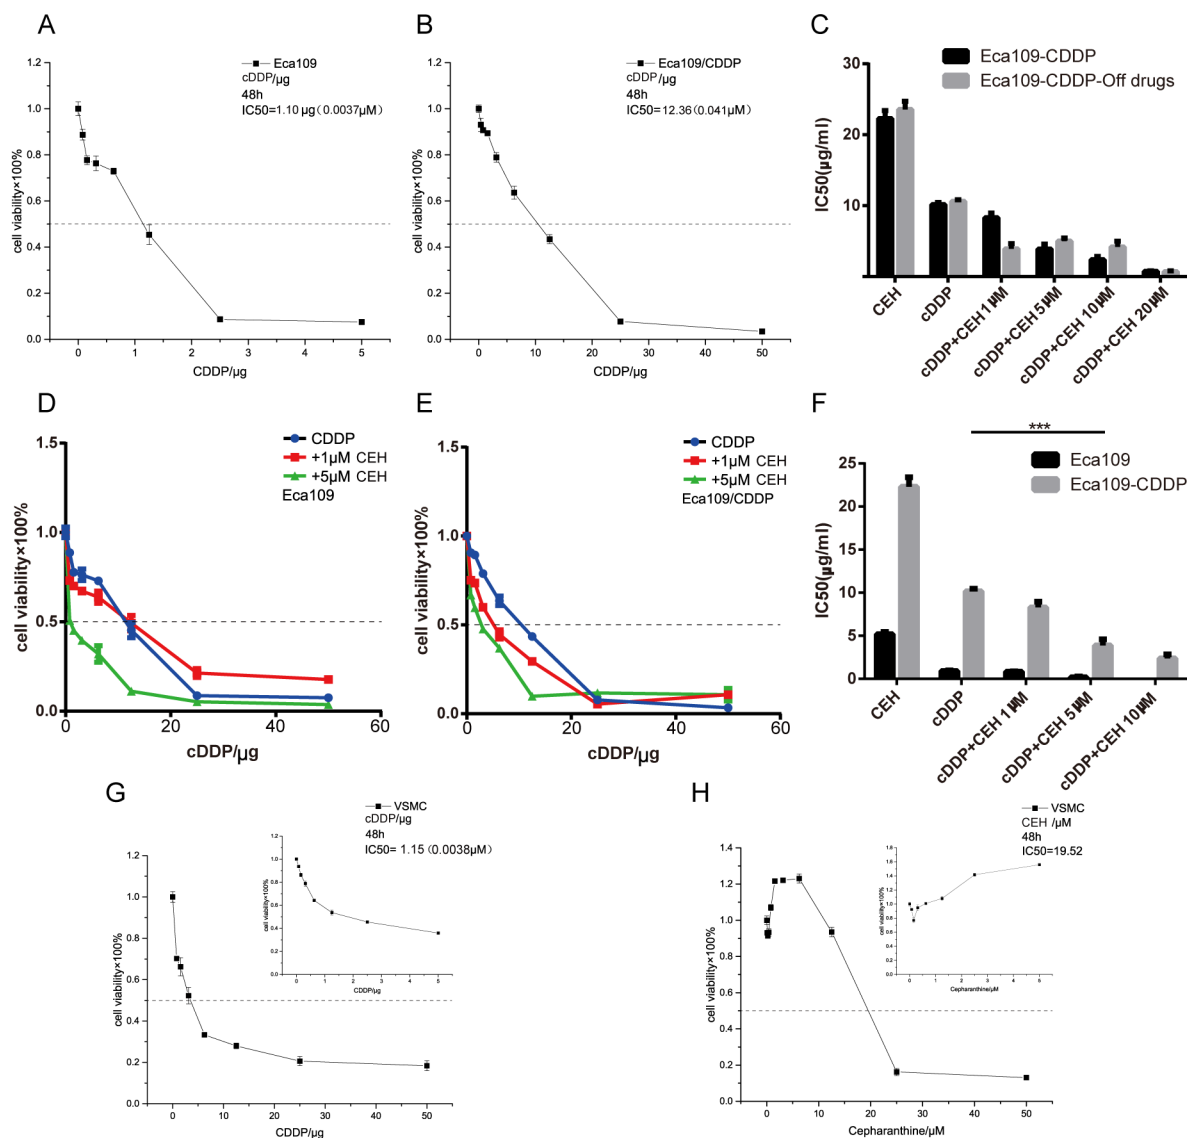

**Supplementary Figure 1: (A and B)** Effects of cisplatin (cDDP) on the growth of the esophageal squamous cell carcinoma cell lines, Eca109 and Eca109/CDDP. Cells were treated with various concentrations of cDDP for 48 h and cell viability was measured by MTT assay. **(C)** Effect of drug withdrawal on resistance of the resistant cell lines. **(D to F)** The effects of 48 h treatment with cDDP and cDDP combined with various concentrations of cepharanthine hydrochloride (CEH) on the growth of Eca109 and Eca109/CDDP cells (D and E). The half maximal inhibitory concentration (IC<sub>50</sub>) was quantified (F). **(G and H)** Effects of CEH and cDDP on the growth of the human aortic smooth muscle cells HA-VSMC. Cells were treated with various concentrations of CEH or cDDP for 48 h, and cell viability was measured by MTT assay. All data are presented as the mean  $\pm$  SD of three independent experiments. \*\*,  $P < 0.01$ ; \*\*\*,  $P < 0.001$  compared to the control.
